# Supplementary material for: Characterization of Cetacean Proline-Rich Antimicrobial Peptides Displaying Activity against ESKAPE Pathogens
Source: MDPI journal article supplement (doi:10.3390/ijms21197367), 2020-10-06
Supplement: s1 [file s1]

**Table S1. MIC of cePrAMPs in 20% Mueller-Hinton broth in PBS.**

| Microorganism and strain         | MIC* (μM) |      |      |      |       |       |      |            |
|----------------------------------|-----------|------|------|------|-------|-------|------|------------|
|                                  | Orc1      | Del1 | Bal1 | Lip1 | Tur1A | Tur1B | Neo1 | Bac7(1-35) |
| <i>E.coli</i> BW25113            | 4         | 1    | 0.5  | 0.5  | 0.5   | 4     | 16   | 0.5        |
| <i>E.coli</i> BW25113 ΔSbmA      | 2         | 1    | 0.5  | 0.5  | 1     | 4     | 8    | 2          |
| <i>E.coli</i> ATCC 25922         | 4         | 2    | 0.5  | 0.5  | 0.5   | 4     | 32   | 0.5        |
| <i>S.aureus</i> ATCC 25923       | 64        | 2    | 4    | 4    | >64   | 16    | 64   | >64        |
| <i>K. Pneumoniae</i> ATCC 700603 | 64        | 8    | 0.5  | 0.5  | 1     | >64   | >64  | 1          |
| <i>A. Baumannii</i> ATCC 19606   | 1         | 1    | 0.5  | 0.5  | 0.5   | 1     | 8    | 0.5        |
| <i>P. aeruginosa</i> ATCC 27853  | 16        | 8    | 1    | 1    | 4     | 16    | 64   | 2          |

\* Results are reported as the median of 3 or more independent experiments (n ≥ 3).
