# Supplementary material for: Characterization of Cetacean Proline-Rich Antimicrobial Peptides Displaying Activity against ESKAPE Pathogens
Source: MDPI journal article supplement (doi:10.3390/ijms21197367), 2020-10-06
Supplement: s1 [file s1]

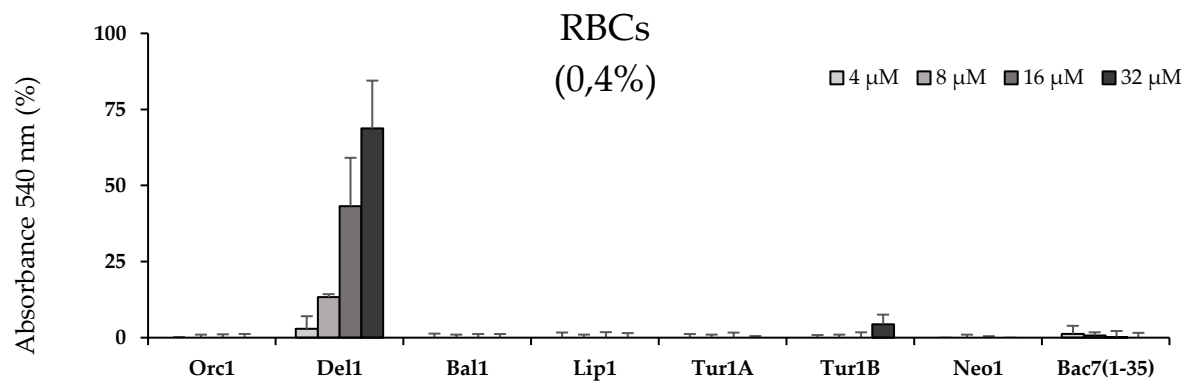

**Figure S2. Hemolysis assay against human red blood cells, re-suspended in PBS at 0,4% (v/v) concentration.** Hemolysis was measured as the absorbance of released haemoglobin (540 nm) after 1h exposure to the peptides. Results are reported as percentages with respect to hRBCs treated for 1h with 1% Triton X-100 (considered as 100% haemolysis), and are the average of 2 independent experiments (n=2).
