# Supplementary material for: Characterization of Cetacean Proline-Rich Antimicrobial Peptides Displaying Activity against ESKAPE Pathogens
Source: MDPI journal article supplement (doi:10.3390/ijms21197367), 2020-10-06
Supplement: s1 [file s1]

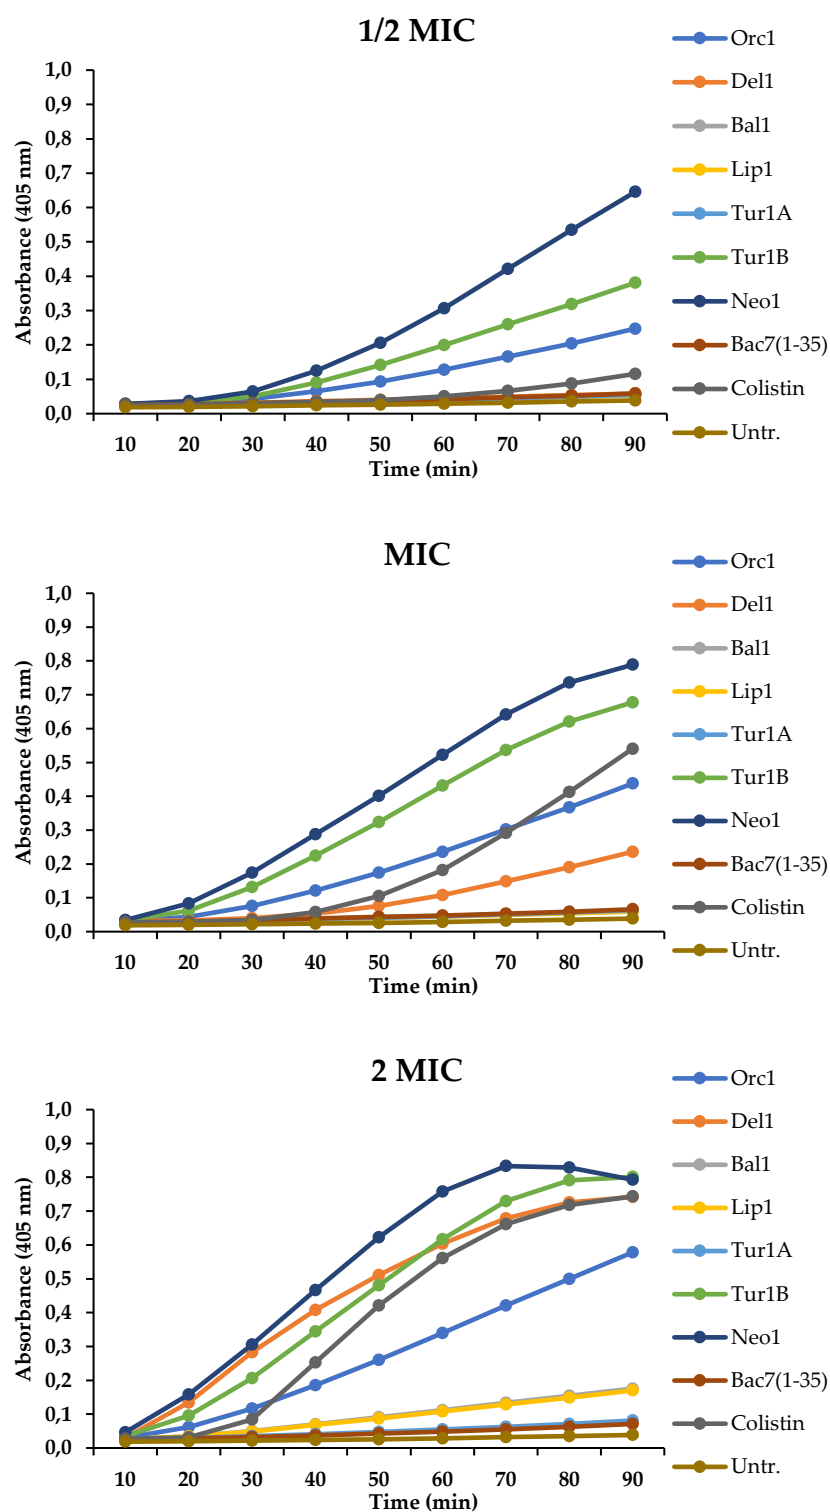

**Figure S1. Kinetics of peptide-induced permeabilization of bacterial membrane.** The absorbance at 405 nm of the ONPG hydrolysis product O-nitrophenol, was measured every 10 minutes for a total of 90 minutes. The membranolytic peptide antibiotic colistin has been used for comparison.
