# Supplementary figures and images for: Characterization of Cetacean Proline-Rich Antimicrobial Peptides Displaying Activity against ESKAPE Pathogens
Source: MDPI journal article supplement (doi:10.3390/ijms21197367), 2020-10-06

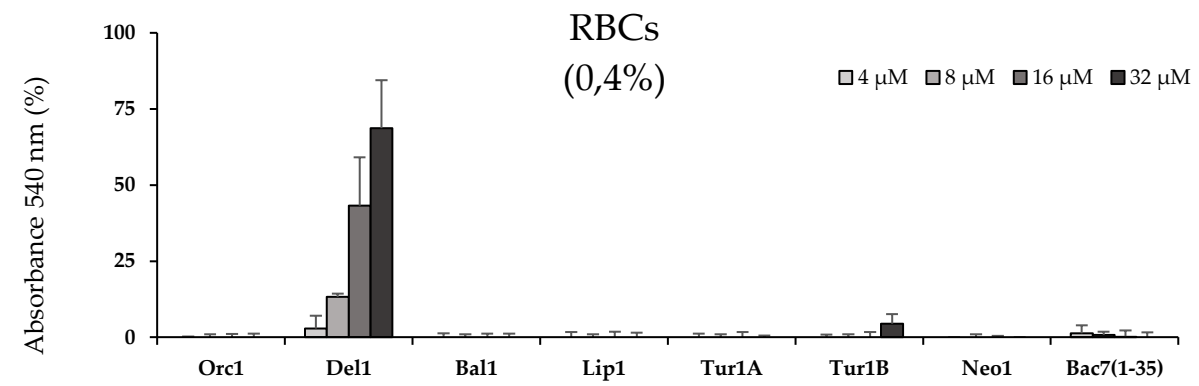

Supplement: s1 [file s1]

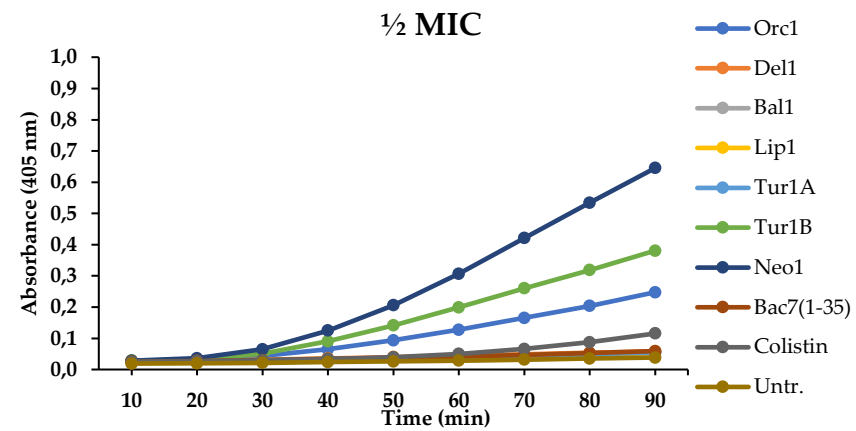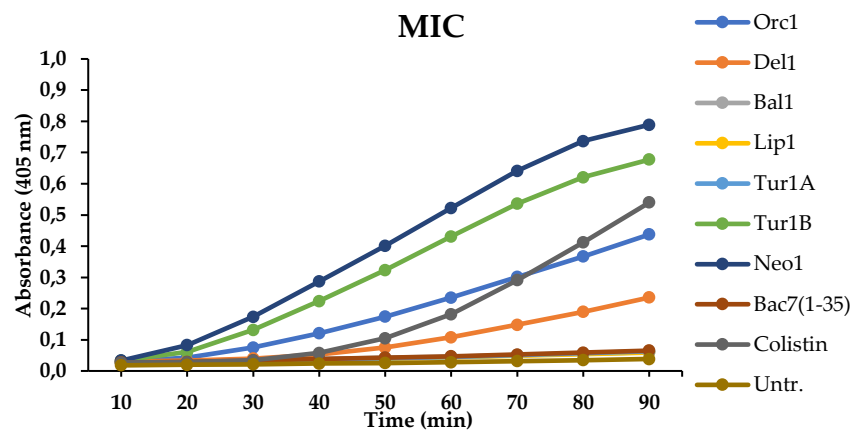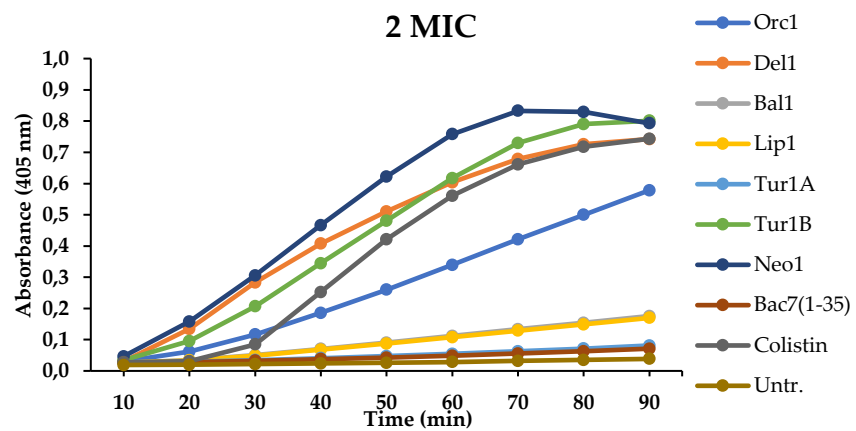

Supplement: s1 [file s1]
